# Supplementary material for: Human Sapovirus among Outpatients with Acute Gastroenteritis in Spain: A One-Year Study
Source: PubMed Central journal article supplement (PMC6409837; doi:10.3390/v11020144), 2019-02-08

**Human sapovirus among outpatients with acute gastroenteritis in Spain: a one year  
study**

Miguel F Varela, Enrique Rivadulla, Alberto Lema, Jesús L Romalde

Department of Microbiology and Parasitology, CIBUS-Faculty of Biology, Universidade de Santiago de Compostela. 15782, Santiago de Compostela, Spain

**Supplementary Material**

**Supplementary Figure S1.** Each of the 6 images (A-F) shows the number of coinfections cases of SaV with other viral and bacteriological agents for the different age-group analysed. Data for other pathogens obtained from previous study [16].

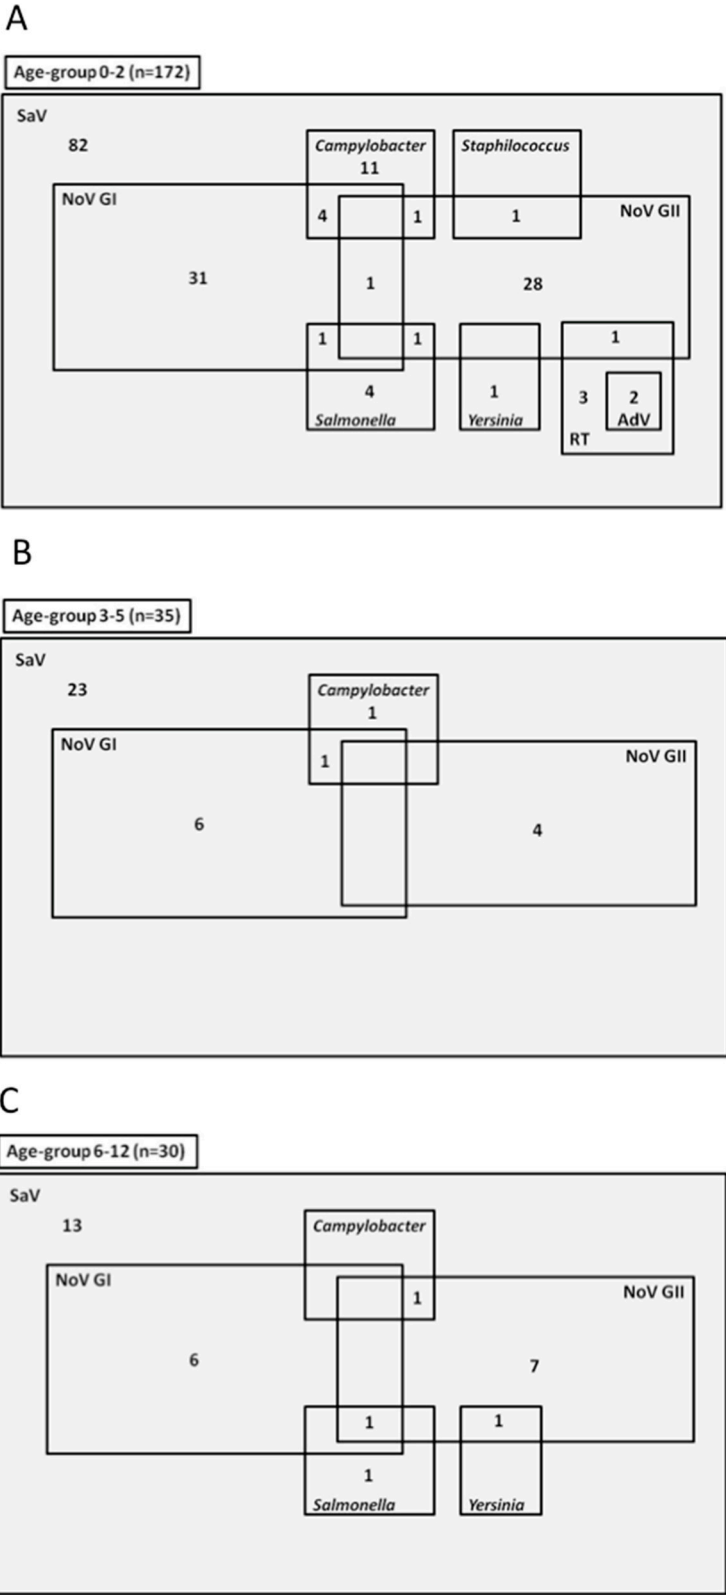

D

Age-group 13-18 (n= 7)

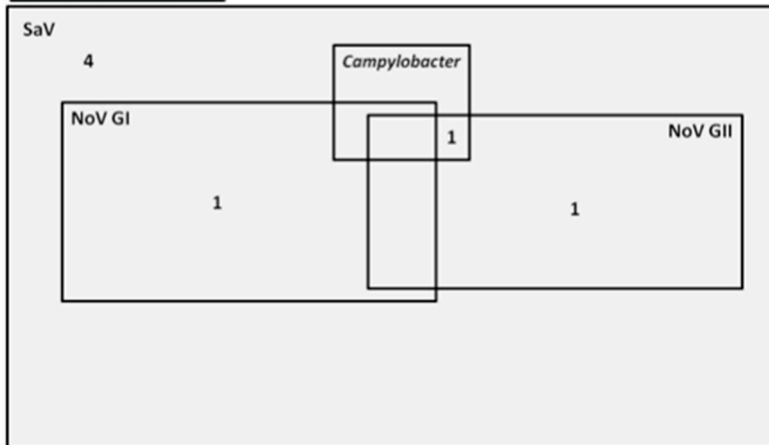

E

Age-group 19-59 (n=79)

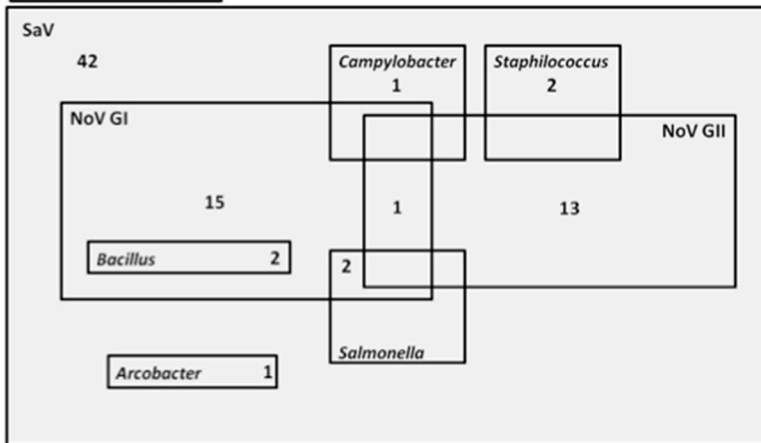

F

Age-group >60 (n=90)

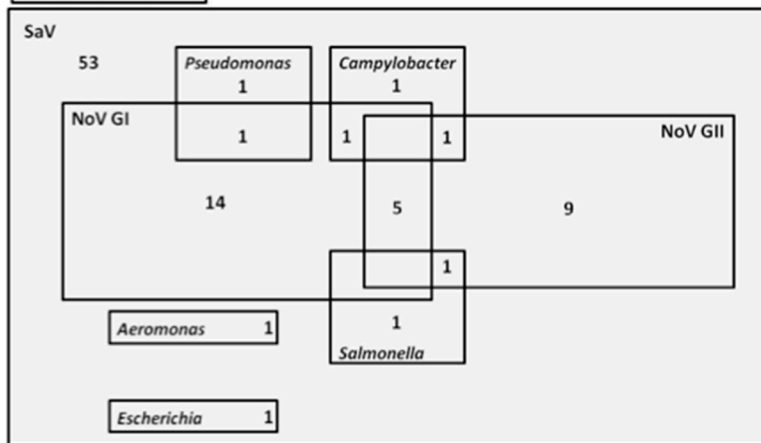

**Supplementary Figure S3.** Phylogenetic trees based on the partial capsid gene sequences of SaV using the Neighbor-Joining algorithm for the sequences obtained in the present study belonging to genotype GI.2 (A), GI.1 (B), GII.1 (C) and GII.4 (D). Bootstrap values (greater than 70 %) are shown at each node as percentages of 1,000 replicates. Bar, nucleotide substitutions per site.

**A**

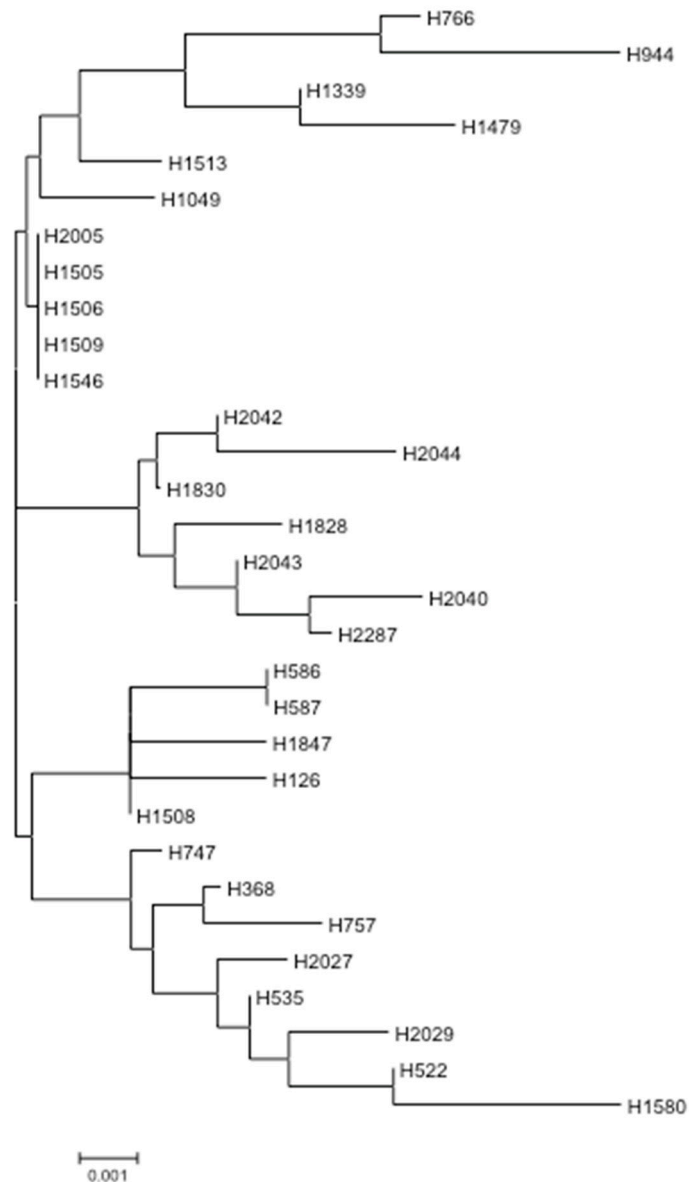

**B**

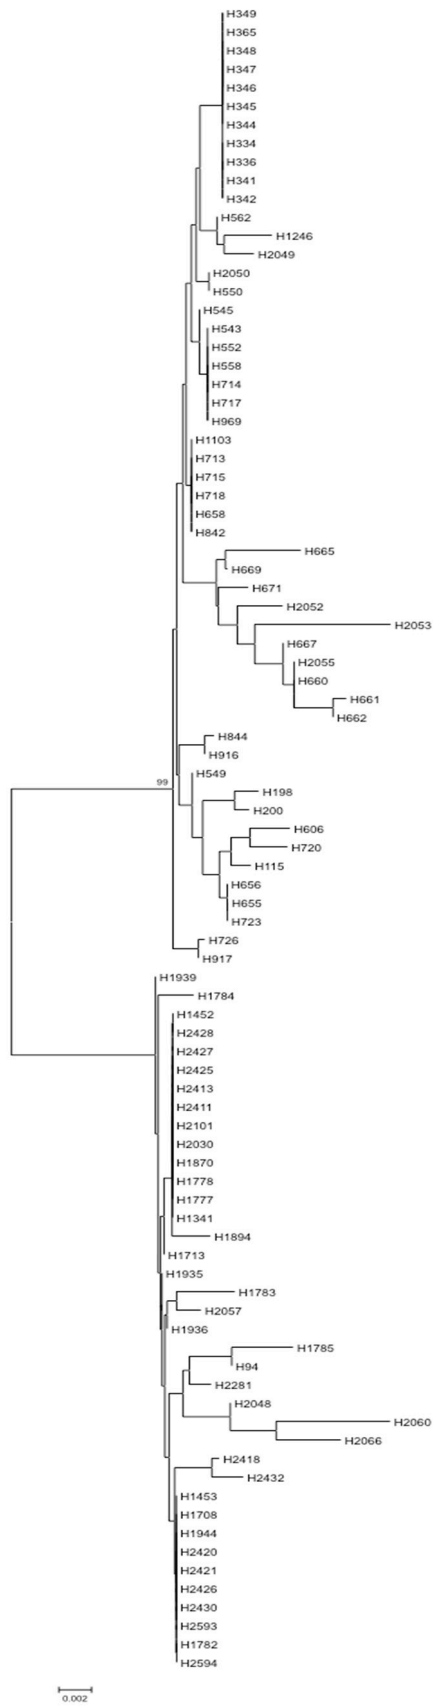

C

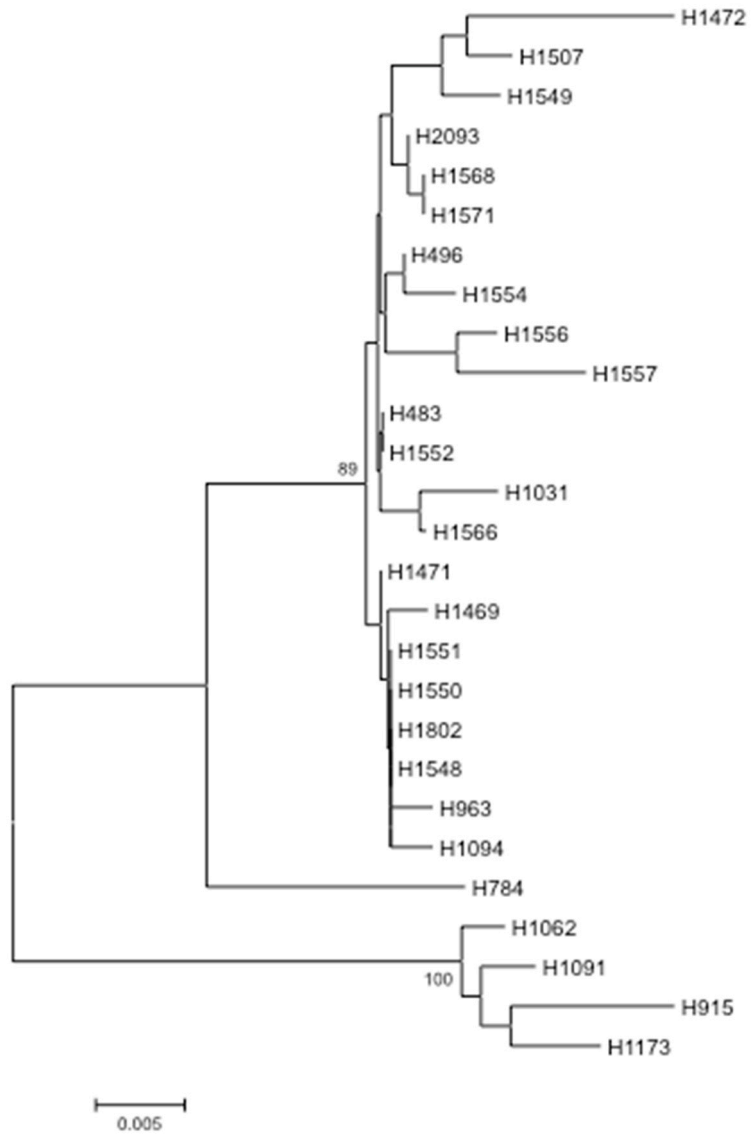

**D**

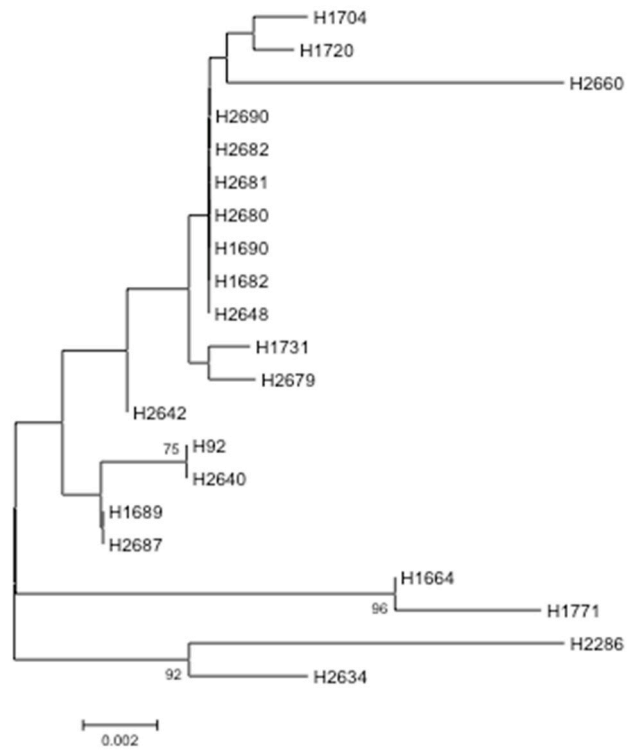

Supplement: viruses-11-00144-s001.pdf [file viruses-11-00144-s001.pdf]
